# Supplementary material
Source: MDPI journal article supplement (https://www.mdpi.com/2071-1050/12/10/4014)
Supplement: s1 [file s1]

The Selected Mosques Buildings

1) Ali Ibn Ahmed Al-Hayyani Mosque Building (AHA-1)

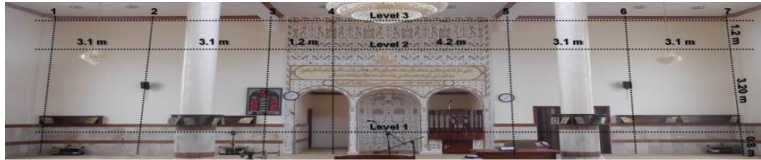

Indoor North Elevation for Al-Hayyani Mosque

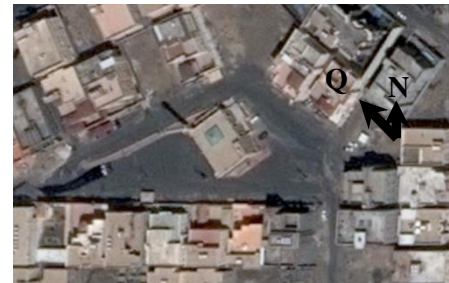

Aerial photo for Al-Hayyani Mosque site

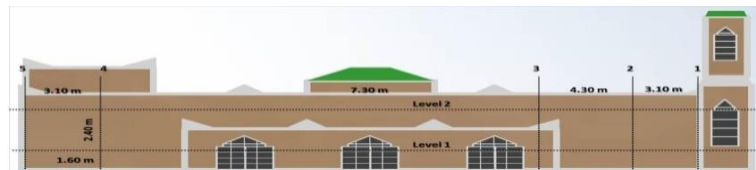

Outdoor North Elevation for Al-Hayyani Mosque

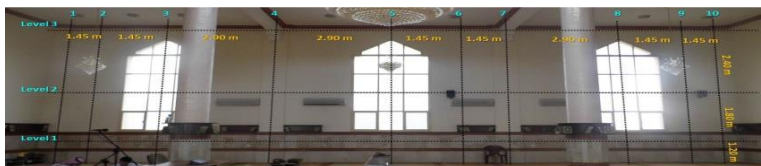

Indoor Eastern Elevation for Al-Hayyani Mosque

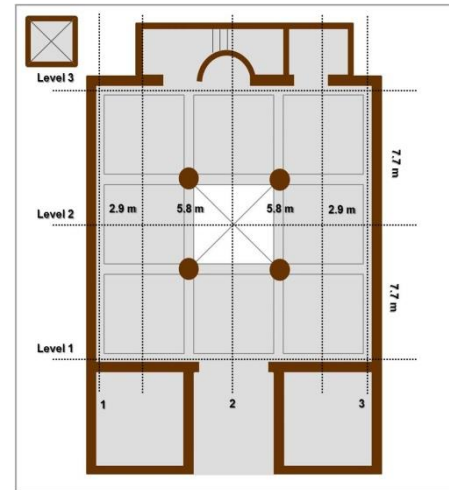

Plan for Al-Hayyani Mosque

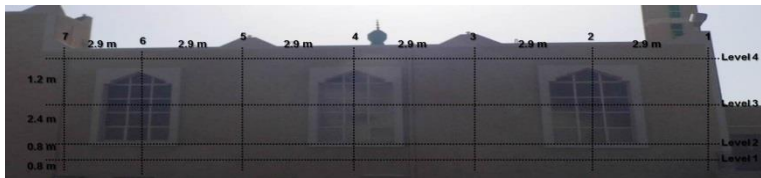

Outdoor Eastern Elevation for Al-Hayyani Mosque

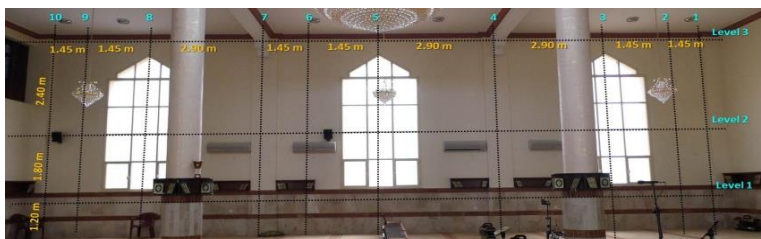

Indoor Western Elevation for Al-Hayyani Mosque

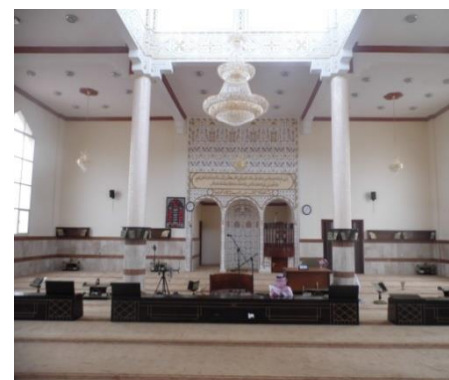

Al-Hayyani Mosque's Ceiling

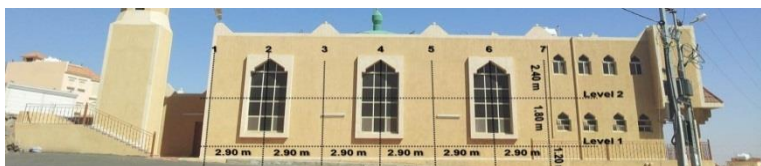

Outdoor Western Elevation for Al-Hayyani Mosque

2) Noor El-Eeman Mosque Building (NEA-2)

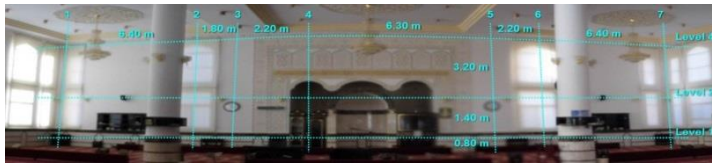

Indoor North Elevation for Noor El-Eeman Mosque

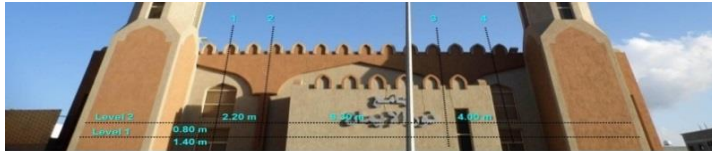

Outdoor North Elevation for Noor El-Eeman Mosque

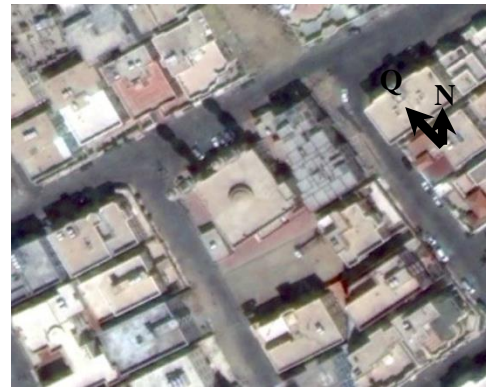

Aerial photo for Noor El-Eeman Mosque site

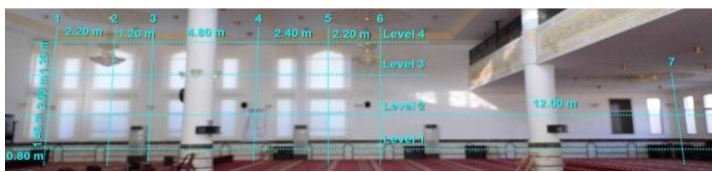

Indoor Eastern Elevation for Noor El-Eeman Mosque

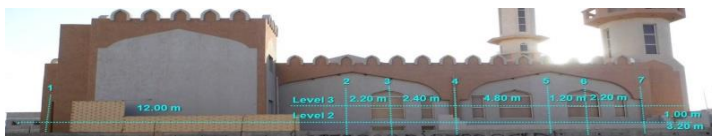

Outdoor Eastern Elevation for Noor El-Eeman Mosque

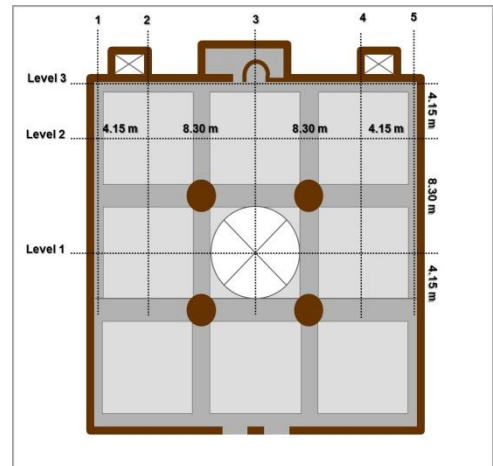

Noor El-Eeman mosque's Plan

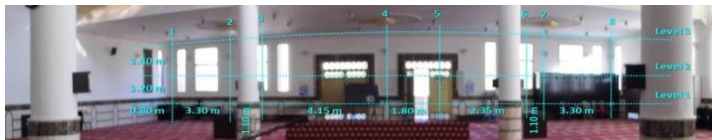

Indoor South Elevation for Noor El-Eeman Mosque

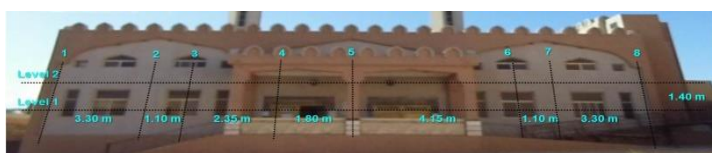

Outdoor Southern Elevation for Noor El-Eeman Mosque

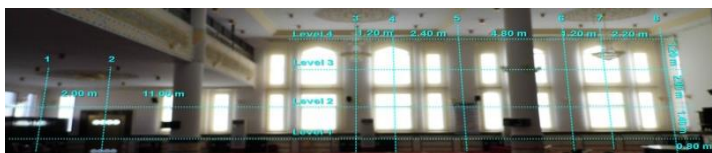

Indoor Western Elevation for Noor El-Eeman Mosque

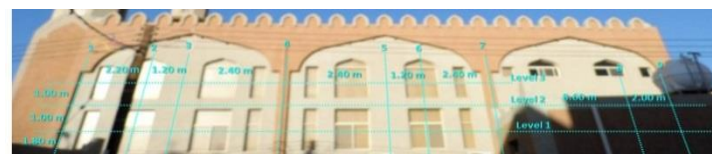

Outdoor Western Elevation for Noor El-Eeman Mosque

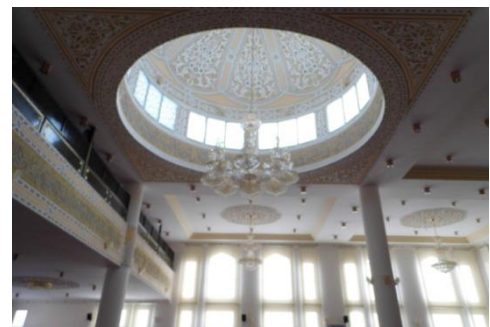

The Ceiling and the dome for Noor El-Eeman Mosque

3) Al-Qudse Mosque Building (QA-3)

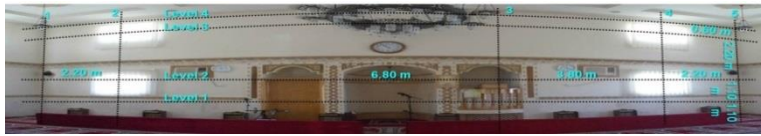

Indoor North Elevation for Al-Qudse Mosque

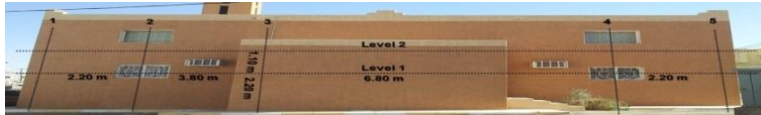

Outdoor North Elevation for Al-Qudse Mosque

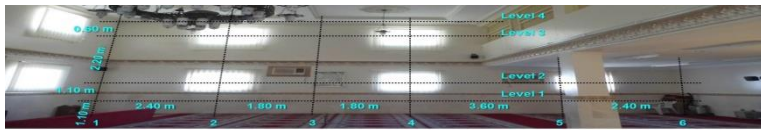

Indoor Eastern Elevation for Al-Qudse Mosque

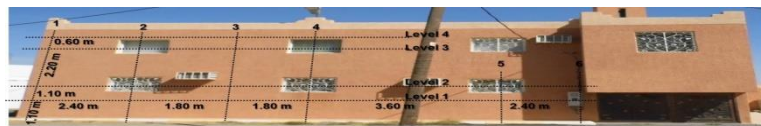

Outdoor Western Elevation for Al-Qudse Mosque

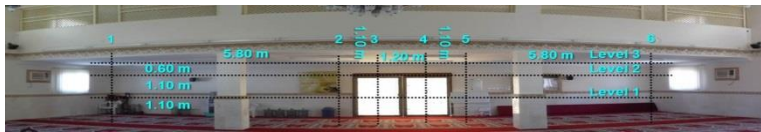

Indoor South Elevation for Al-Qudse Mosque

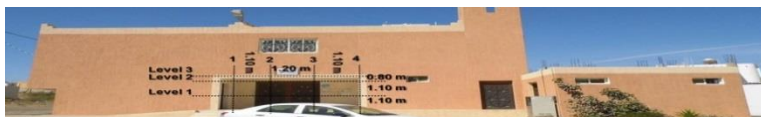

Outdoor South Elevation for Al-Qudse Mosque

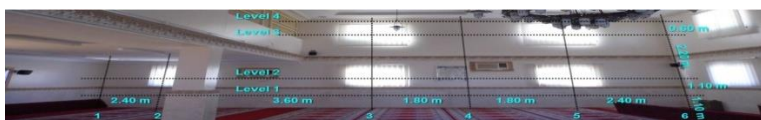

Indoor Western Elevation for Al-Qudse Mosque

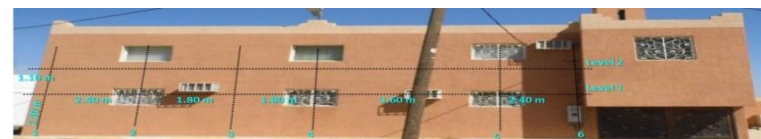

Outdoor Western Elevation for Al-Qudse Mosque

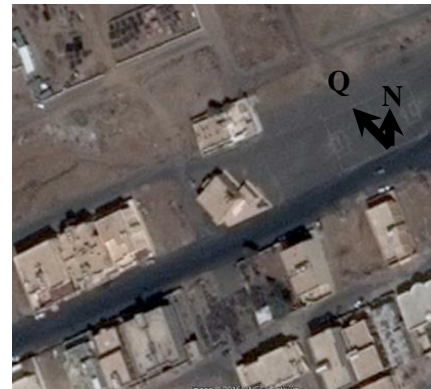

Aerial photo for Al-Qudse Mosque site

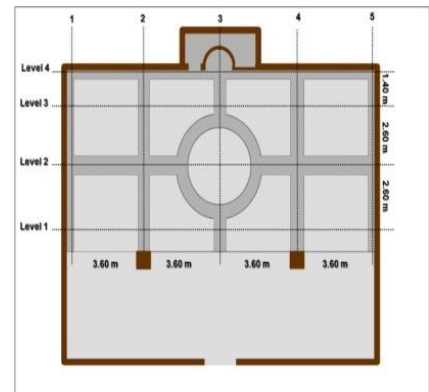

Al-Qudse mosque's Plan

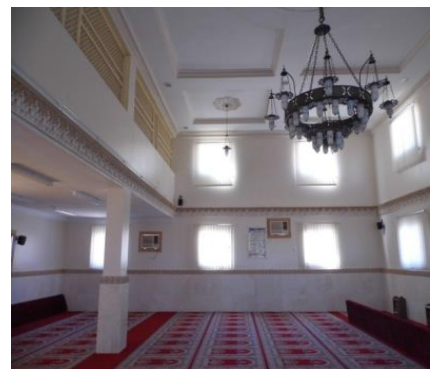

Al-Qudse mosque's Ceiling
